# Supplementary material
Source: publisher figshare collection journal article supplement (https://sage.figshare.com/ndownloader/files/14878040)
Supplement: Supplementary file 1 [file 14878040]

Supplementary Table 2

*Multivariate Summary Table of Associations Between Mexican-American Cultural Values and Self-Reported Health (Panel 1) and Those Relations Moderated by Mexican-American Cultural Values (Panel 2)*

Panel 1

| Dependent Variable                                     | $F_{(1, 79)}$ | $p$  | $Eta^2$ |
|--------------------------------------------------------|---------------|------|---------|
| SF-36 Physical Functioning Scale                       | 0.11          | .744 | <.01    |
| SF-36 Role Limitations due to Physical Health Scale    | 3.47          | .066 | .04     |
| SF-36 Role Limitations due to Emotional Problems Scale | 0.02          | .888 | <.01    |
| SF-36 Energy/Fatigue Scale                             | 0.51          | .479 | .01     |
| SF-36 Emotional Well-Being Scale                       | 0.01          | .913 | <.01    |
| SF-36 Social Functioning Scale                         | 4.75          | .032 | .06     |
| SF-36 Pain Scale                                       | 2.60          | .111 | .03     |

Panel 2

| Dependent Variable                                     | $F_{(1, 78)}$ | $p$  | $Eta^2$ |
|--------------------------------------------------------|---------------|------|---------|
| SF-36 Physical Functioning Scale                       | 2.39          | .127 | .03     |
| SF-36 Role Limitations due to Physical Health Scale    | 0.01          | .922 | <.01    |
| SF-36 Role Limitations due to Emotional Problems Scale | 7.43          | .008 | .09     |
| SF-36 Energy/Fatigue Scale                             | 7.13          | .009 | .08     |
| SF-36 Emotional Well-Being Scale                       | 8.72          | .004 | .10     |
| SF-36 Social Functioning Scale                         | 2.34          | .131 | .03     |
| SF-36 Pain Scale                                       | 1.88          | .174 | .02     |
